# Supplementary material for: PinX1 serves as a potential prognostic indicator for clear cell renal cell carcinoma and inhibits its invasion and metastasis by suppressing MMP-2 via NF-κB-dependent transcription
Source: PubMed Central journal article supplement (PMC4673274; doi:10.18632/oncotarget.4011), 2015-05-27
Supplement: oncotarget-06-21406-s001.pdf [file oncotarget-06-21406-s001.pdf]

## SUPPLEMENTARY FIGURE AND TABLES

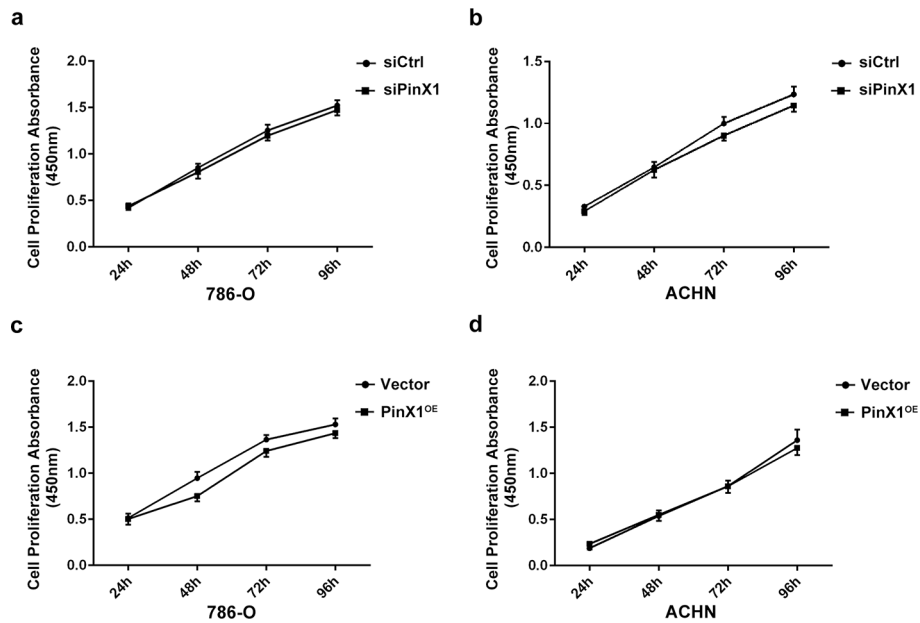

**Supplementary Figure S1: PinX1 had no effect on the proliferation of ccRCC cells.** a. and b. CCK-8 proliferation assay showed that the proliferation ability was not changed in 786-O and ACHN cells transfected with PinX1 siRNA or control siRNA. c. and d. The proliferation ability was not changed in 786-O and ACHN cells transfected with pEGFP-C3-PinX1 plasmid or vector control. All experiments were carried out in triplicate. Line chart represent means  $\pm$  SD.

**Supplementary Table S1: Univariate Cox proportional regression analysis on 5-year overall and disease-specific survival of 278 clear cell renal cell carcinoma patients**

| Variable*                        | Overall survival |             |            | Disease-specific survival |             |            |
|----------------------------------|------------------|-------------|------------|---------------------------|-------------|------------|
|                                  | Hazard ratio     | 95% CI†     | <i>P</i> * | Hazard ratio              | 95% CI†     | <i>P</i> * |
| PinX1                            |                  |             |            |                           |             |            |
| Low                              | 1.000            |             | 0.003      | 1.000                     |             | 0.002      |
| High                             | 0.628            | 0.464–0.850 |            | 0.600                     | 0.433–0.832 |            |
| Age                              |                  |             |            |                           |             |            |
| ≤56 years                        | 1.000            |             | 0.843      | 1.000                     |             | 0.999      |
| >56 years                        | 1.028            | 0.780–1.356 |            | 1.000                     | 0.742–1.348 |            |
| Tumor size                       |                  |             |            |                           |             |            |
| ≤7 cm                            | 1.000            |             | 0.014      | 1.000                     |             | 0.009      |
| >7 cm                            | 1.529            | 0.924–1.815 |            | 1.602                     | 1.271–1.853 |            |
| pT status                        |                  |             |            |                           |             |            |
| pT <sub>1</sub> –pT <sub>2</sub> | 1.000            |             | 0.005      | 1.000                     |             | 0.008      |
| pT <sub>3</sub> –pT <sub>4</sub> | 1.631            | 1.159–2.294 |            | 1.451                     | 0.987–2.132 |            |
| pN status                        |                  |             |            |                           |             |            |
| pN <sub>0</sub>                  | 1.000            |             | 0.003      | 1.000                     |             | 0.005      |
| pN <sub>1</sub> –pN <sub>3</sub> | 2.297            | 1.723–2.732 |            | 2.269                     | 2.067–2.480 |            |
| TNM stage                        |                  |             |            |                           |             |            |
| I–II                             | 1.000            |             | 0.002      | 1.000                     |             | 0.004      |
| III–IV                           | 1.674            | 1.200–2.336 |            | 1.763                     | 1.379–2.021 |            |

\**P* values are from Log-rank test.

†CI: confidence interval.

**Supplementary Table S2: Multivariate Cox regression analysis on 5-year overall and disease-specific survival of 278 clear cell renal cell carcinoma patients**

| Variable*  | Overall survival |                |          | Disease-specific survival |                |          |
|------------|------------------|----------------|----------|---------------------------|----------------|----------|
|            | Hazard ratio     | 95% CI†        | <i>P</i> | Hazard ratio              | 95% CI         | <i>P</i> |
| PinX1      | 0.640            | 0.469 to 0.874 | 0.005    | 0.611                     | 0.436 to 0.857 | 0.004    |
| Age        | 0.980            | 0.731 to 1.313 | 0.892    | 0.948                     | 0.690 to 1.303 | 0.742    |
| Tumor size | 1.521            | 1.358 to 1.802 | 0.021    | 1.480                     | 0.964 to 1.861 | 0.033    |
| TNM stage  | 1.509            | 1.053 to 2.163 | 0.025    | 1.720                     | 1.388 to 1.952 | 0.025    |

\*Coding of variables: PinX1 was coded as 1 (low), and 2 (high). Age was coded as 1 (≤56 years), and 2 (>56 years). Tumor size was coded as 1 (≤7 cm), and 2 (>7 cm). TNM stage was coded as 1 (I–II), and 2 (III–IV).

†CI: confidence interval.
